# Supplementary material for: Chloroquine and Rapamycin Augment Interleukin‐37 Expression via the LC3, ERK, and AP‐1 Axis in the Presence of Lipopolysaccharides
Source: Hindawi journal article supplement (doi:10.1155/2020/6457879), 2020-01-01
Supplement: f1 [file 6457879.f1.pdf]

## Supplementary Files

### Supplementary Figure 1.

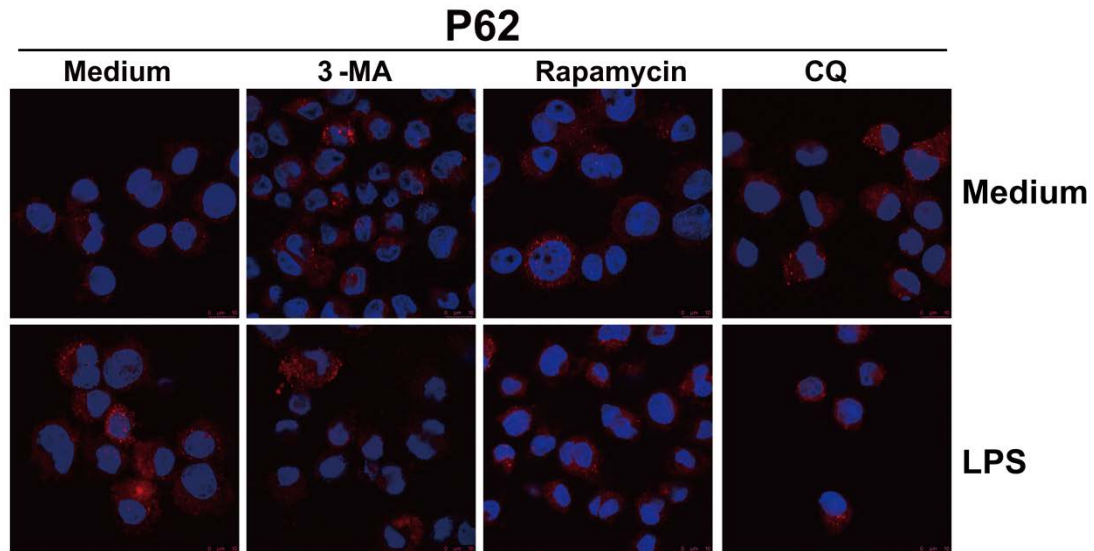

#### Supplementary Figure 1. Immunofluorescence staining of P62/SQSTM1.

U937 cells were treated with 400 nM rapamycin, 20  $\mu$ M chloroquine (CQ), or 1 mM 3-methyladenine (3-MA) respectively with or without lipopolysaccharides (LPS,200ng/ml) stimulation for 2 hours. Thereafter, cells were stained with Alexa Fluor 647 conjugated anti- P62/SQSTM1 and observed with a confocal microscope. Neither CQ nor 3-MA treatment induced a significant upregulation of P62/SQSTM1.

Supplementary Figure 2.

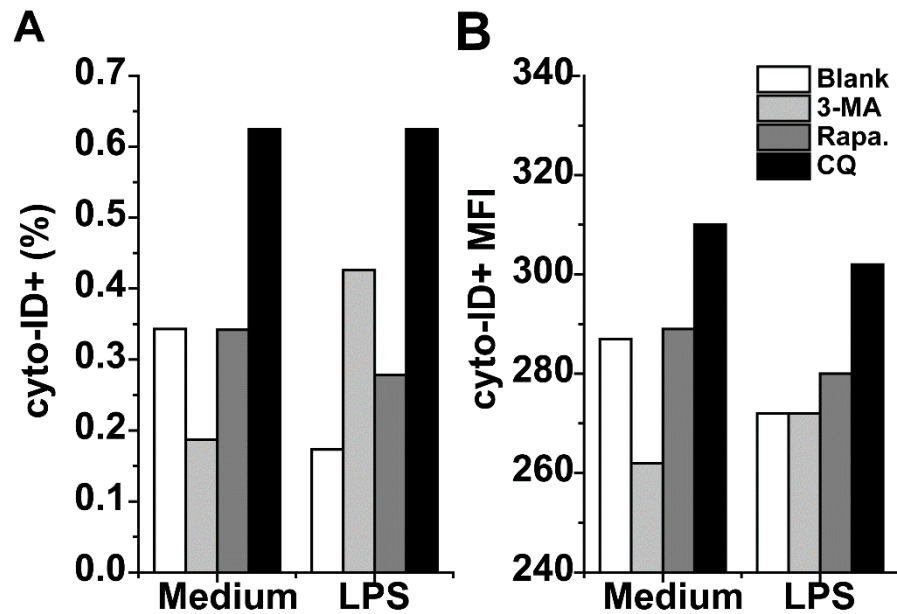

Supplementary Figure 2. Flow cytometry analysis of autophagic U937 cells labeled with Cyto-ID kit.

U937 cells were treated with rapamycin, chloroquine, or 3-methyladenine respectively with or without lipopolysaccharides stimulation for 2 hours. With flow cytometry analysis, proportion (A) and mean fluorescence density (MFI) (B) of Cyto-ID labeled autophagic U937 cells were showed in columns.

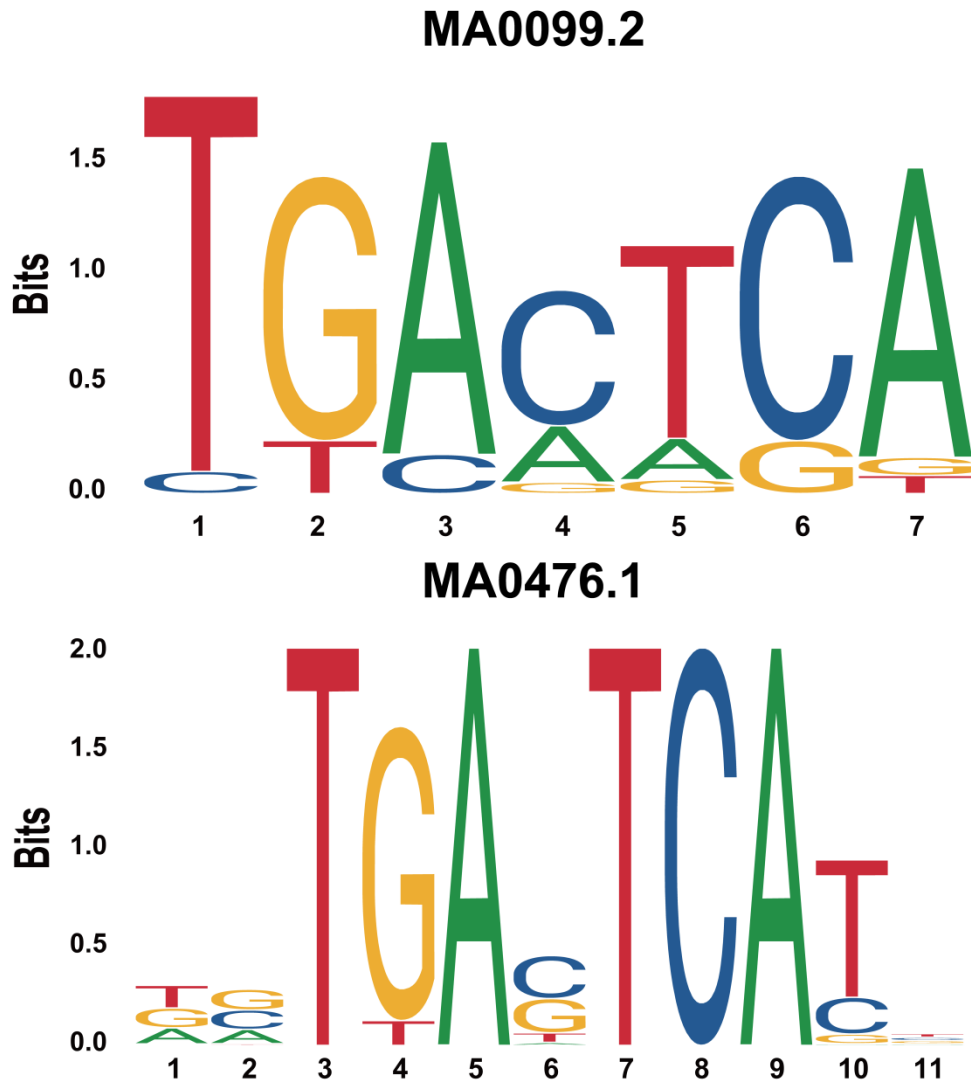

**Supplementary Figure 3. Sequence logo of matrix profiles with putative binding sites of AP-1.**

With JASPAR database (<http://jaspar.cgb.ki.se>), matrix profiles MA0099.2 and MA0476.1 with putative binding sites of AP-1 transcription factors were identified in the IL-37 promoter region.

**Supplementary Table 1. Primer sequences used in this study.**

| <b>Primer</b>  | <b>Sequence (5'–3')</b>                                     |
|----------------|-------------------------------------------------------------|
| Human          |                                                             |
| IL-37          | F: TTAGAAGACCCGGCTGGAAGCC<br>R: AGATCTCTGGGCGTATGTAGT       |
| IL-18          | F: ATGGCTGCTGAACCAGTAGAAG<br>R: CAGCCATACCTCTAGGCTGGC       |
| IL-6           | F: ACTCACCTCTTCAGAACGAATTG<br>R: CCATCTTTGGAAGGTTTCAGGTTG   |
| TNF- $\alpha$  | F: GGCTCCAGGCGGTGCTTGTTTC<br>R: AGACGGCGATGCGGCTGATG        |
| IL-1R8         | F: TCAGTGGCTCTGAACTGCAC<br>R: GTACCAGAGCAGCACGTTGA          |
| IL-18 $\alpha$ | F: CACAGACACCAAAAGCTTCATC<br>R: CAC AGT CAC TAG GCA CAC TAC |
| IL-1 $\beta$   | F: ACAGATGAAGTGCTCCTTCCA<br>R: GTCGGAGATTCGTAGCTGGAT        |
| GAPDH          | F: ACAGTCCATGCCATCACTG<br>R: AGTAGAGGCAGGGATGATG            |
| Rhesus macaque |                                                             |
| IL-37          | F:TTAGAAGACCCGGCTGGAAGCC<br>R:AGATCTCTGGGCGTATGTAGT         |
| GAPDH          | F: GTCTGGAAAAACCTGCCAAG<br>R: ACCTGGTGCTCAGTGTAGCC          |

**Supplementary Table 2. Sequences and locations of AP1 putative binding sites within the promotor region of IL-37 analyzed with the JASPAR database.**

| Matrix ID | Name     | Score   | Relative score | Start | End | Strand | Predicted sequence |
|-----------|----------|---------|----------------|-------|-----|--------|--------------------|
| MA0099.2  | FOS::JUN | 10.664  | 1              | 221   | 227 | +      | TGACTCA            |
| MA0476.1  | FOS      | 10.2377 | 0.92548        | 219   | 229 | +      | TTTGACTCACC        |
| MA0099.2  | FOS::JUN | 8.18522 | 0.909521       | 257   | 263 | +      | TGCCTCA            |
